# Supplementary material for: Modulating anti-thermal and concentration quenching for enhanced dysprosium emission
Source: Royal Society of Chemistry journal article supplement (doi:10.1039/d5nr02023a), 2025-01-01
Supplement: d5nr02023a1.pdf [file d5nr02023a1.pdf]

## Supporting Information

### **Modulating Anti-Thermal and Concentration Quenching for Enhanced Dysprosium Emission**

Wasim Ullah Khan<sup>a,b</sup>, Haris Zaman<sup>b</sup>, Waheed Ullah Khan<sup>a</sup>, Haiou Zhu<sup>a,\*</sup>

*a. Analysis and Testing Center, Shenzhen Technology University/College of new Materials and new  
Energies, Shenzhen Technology University, Pingshan Shenzhen, 518118 P.R. China.*

*b. Institute of Chemical Sciences University of Peshawar, Pakistan.*

#### **Corresponding Author**

\*Email: [zhuhaious@sztu.edu.cn](mailto:zhuhaious@sztu.edu.cn)

**Table S1.** Fraction Atomic Coordinates and Equivalent Isotropic Displacement Parameters ( $\text{\AA}^2$ ) for SLAB:0.015Tm<sup>3+</sup>,Dy<sup>3+</sup>.

| Atoms   | Site | X            | Y              | Z             | U <sub>iso</sub> | N               |
|---------|------|--------------|----------------|---------------|------------------|-----------------|
| Sr1/La1 | 2c   | 0.333/0.333  | 0.666/0.666    | 0.250/0.250   | 0.0121(13)       | 0.202/0.797(14) |
| Sr2/La2 | 6h   | 0.128/128(5) | 0.840/0.840(5) | 0.250/0.250   | 0.99(2)          | 0.98/0.12(5)    |
| Al      | 6g   | 0            | $\frac{1}{2}$  | 0             | 0.0160(15)       | 1               |
| B1      | 6h   | 0.2168(3)    | 0.7636(3)      | $\frac{3}{4}$ | 0.004(5)         | 1               |
| B2      | 4e   | 0            | 0              | -0.0899(12)   | 0.04(2)          | $\frac{1}{2}$   |
| O1      | 12i  | 0.3407(13)   | 0.9233(12)     | $\frac{1}{4}$ | 0.016(4)         | 1               |
| O2      | 12i  | 0.3006(2)    | 0.4660(14)     | 0.5369        | 0.019(4)         | 1               |
| O3      | 6h   | -0.0435(9)   | 0.1037(8)      | 0.4071(12)    | 0.010(2)         | 1               |
| O4      | 6h   | 0.08261(3)   | 0.4637(3)      | 0.2500(3)     | 0.016(4)         | 1               |

Space group *P63/m*:  $a = b = 10.3867(3)$  Å,  $c = 5.8146(4)$  Å, Reliability factor:  $R_p = 0.0275$ ,  $R_{wp} = 0.0453$ .

**Table S2.** Some selected bond lengths of SLAB:0.015Tm<sup>3+</sup>,0.05Dy<sup>3+</sup> phosphor.

| Atoms      | SLAB:0.015Tm <sup>3+</sup> ,0.05Dy <sup>3+</sup> |
|------------|--------------------------------------------------|
| Sr1/La1–O1 | 2.281(11) Å X 3                                  |
| Sr1/La1–O3 | 2.295(7) Å X 6                                   |
| Sr2/La2–O1 | 2.353(11) Å X 1                                  |
| Sr2/La2–O2 | 2.205(11) Å X 1                                  |
| Sr2/La2–O3 | 2.335(8) Å X 2                                   |
| Sr2/La2–O4 | 2.446(2) Å X 1                                   |
| Sr2/La2–O4 | 2.420(3) Å X 1                                   |
| Sr2/La2–O4 | 2.423(3) Å X1                                    |
| Al–O1      | 1.926(7) Å X 2                                   |
| Al–O2      | 2.080(10) Å X2                                   |
| Al–O3      | 1.796(8) Å X 2                                   |
| B1–O2      | 1.305(3) Å X 1                                   |
| B1–O3      | 1.347(2) Å X 2                                   |
| B2–O4      | 1.712(13) Å X 3                                  |

**Table-S3.** Lifetimes, fitting Parameters, energy transfer rates, and quantum efficiency for SLAB:Tm<sup>3+</sup>,xDy<sup>3+</sup> (x = 0 to 0.15) from measurements of Dy<sup>3+</sup> emission at RT.

| Sm <sup>3+</sup> | R <sup>2</sup> <sub>adj</sub> | τ*    | <sup>a</sup> k <sub>ET</sub> (μs) <sup>-1</sup> | η (%) |
|------------------|-------------------------------|-------|-------------------------------------------------|-------|
| 0                | 0.9995                        | 22.35 | 0.00                                            | 0.0   |
| 0.01             | 0.9993                        | 20.07 | 5.08                                            | 11.70 |
| 0.05             | 0.9979                        | 16.13 | 17.64                                           | 29.01 |
| 0.10             | 0.9953                        | 10.83 | 47.61                                           | 52.84 |
| 0.15             | 0.9918                        | 6.53  | 88.77                                           | 70.23 |

**Table-S4.** Calculated D<sub>uv</sub> value of color quality and chromaticity shift (ΔE) of SLAB:0.015Tm<sup>3+</sup>,0.05Dy<sup>3+</sup> along with various temperatures.

| Value of x | Color coordinates |       | D <sub>uv</sub> | (ΔE)×10 <sup>-3</sup> |
|------------|-------------------|-------|-----------------|-----------------------|
|            | X                 | Y     |                 |                       |
| 300 K      | 0.321             | 0.335 | 0.0023          | 0.00                  |
| 350 K      | 0.324             | 0.330 | - 0.0014        | 8.31                  |
| 400 K      | 0.322             | 0.328 | - 0.0020        | 8.90                  |
| 450 K      | 0.318             | 0.322 | - 0.0073        | 9.12                  |
| 500 K      | 0.313             | 0.317 | -0.0032         | 10.31                 |

## Supplementary Figures and Tables

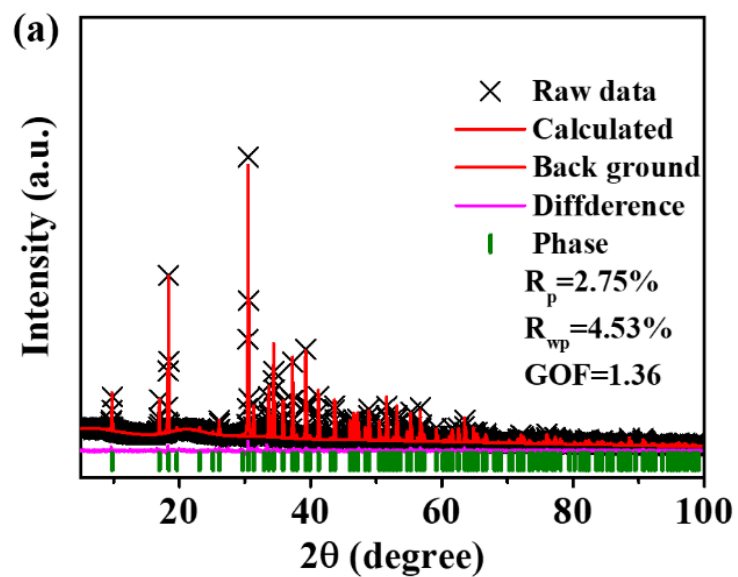

**Fig. S1.** Rietveld refinement result of the SLAB:0.015Tm<sup>3+</sup>,0.10Dy<sup>3+</sup>.

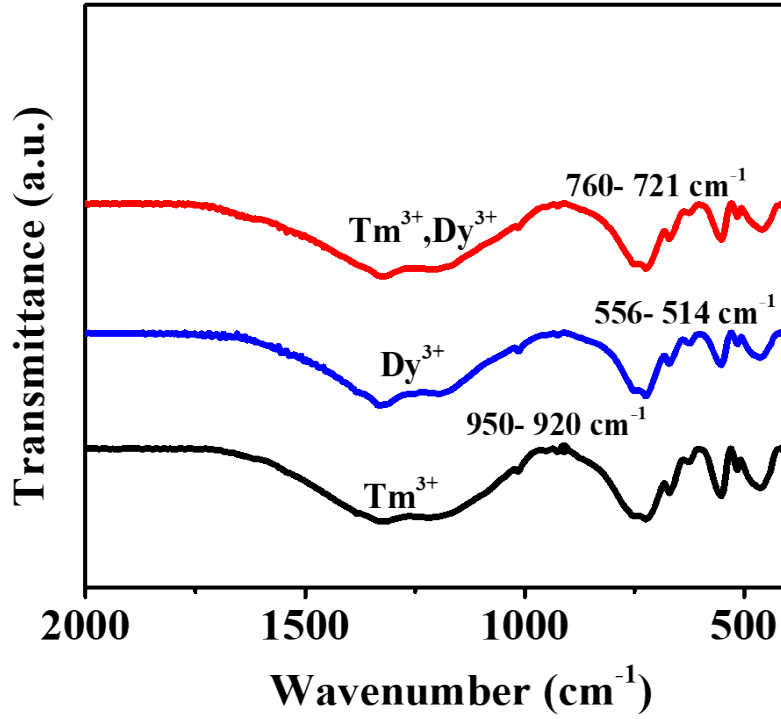

**Fig. S2.** FTIR spectra of singly doped and codoped  $\text{Tm}^{3+}, \text{Dy}^{3+}$  phosphors.

The absorption peak between 200 and 290 nm corresponds to the host, while the peaks between 200 and 500 nm are attributed to transitions involving  $\text{Tm}^{3+}$  or  $\text{Dy}^{3+}$  ions. Such an interpretation is compatible with the f-f transitions observed in their PLE spectrum. The bandgap for the host material is typically calculated using the formula below.

$$F(R_{\infty}) = \frac{A(1 - R)}{2R} = K/S \quad (\text{S1})$$

The absorption, the scattering coefficient, and the reflections are denoted by the letters K, R, and S in this instance. The estimated value of  $E_g$  is approximately 4.96 eV (**Fig. 3b**), derived from the linear extrapolation of  $[F(R_{\infty})hv]^2 = 0$ .

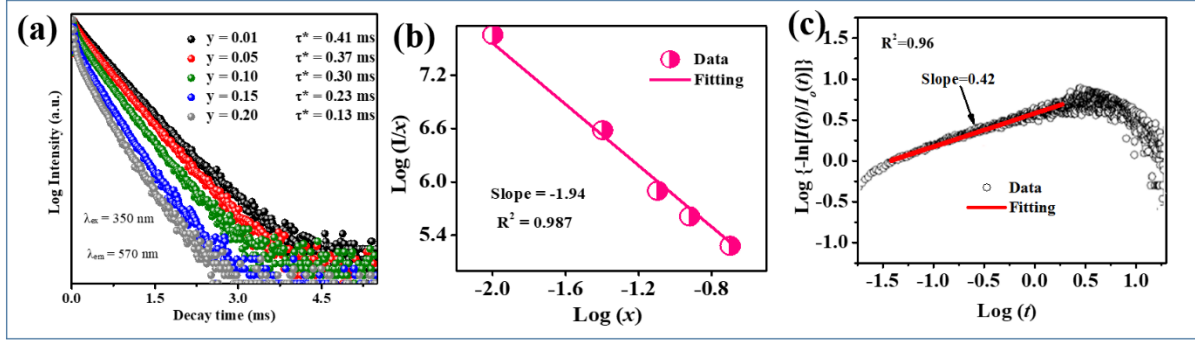

**Fig. S3.** (a) Decay times of the SLAB:yDy<sup>3+</sup>. (b) The linear relationship of log(I/x) vs log(x) and (c) the fitting with the Inokuti-Hirayama model of the SLAB:yDy<sup>3+</sup>.

The distance between ions can be estimated using an equation.

$$R \approx 2 \left[ \frac{3V}{4\pi x_c N} \right]^{1/3} \quad (S2)$$

In which  $V$  is referred to as cell volume,  $N$  is the number of molecules in the unit cell, and  $x_c$  is the total concentration of Tm<sup>3+</sup> and Dy<sup>3+</sup>. For the SLAB:0.015Tm<sup>3+</sup>,0.08Dy<sup>3+</sup> host with N=2, V=546.45 Å<sup>3</sup> (denoting the cell volume), and a concentration of Tm<sup>3+</sup> and Dy<sup>3+</sup> at 0.095, the computed critical distance is approximately 17.65 Å. This estimation suggests a minimal possibility for ET through exchange interaction due to the relatively large distance between ions, showing a tiny possibility for ET through the exchange interaction.

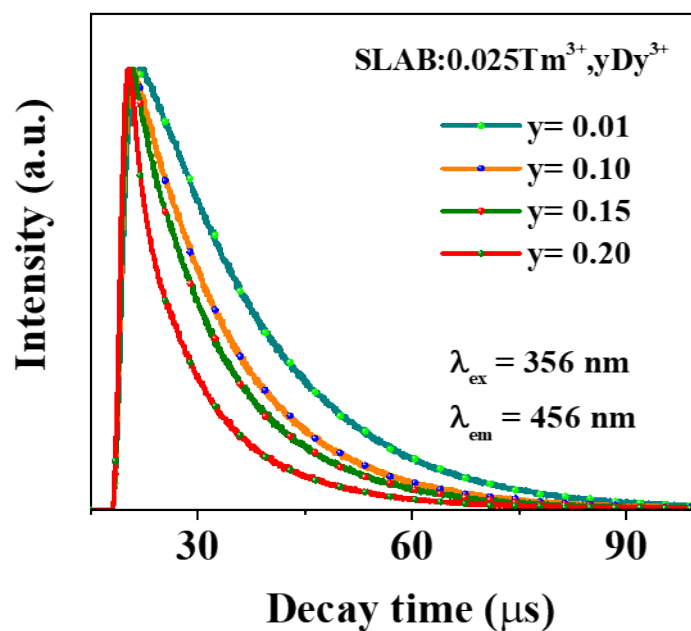

**Fig. S4.** Decay plots of the samples SLAB:0.025Tm<sup>3+</sup>,yDy<sup>3+</sup> (y=0.01, 0.1, 0.15 and 0.20).

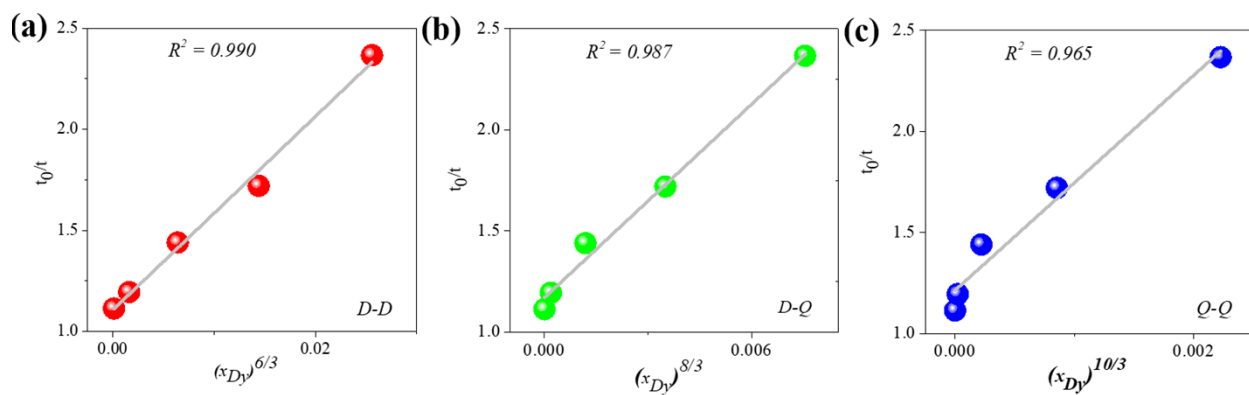

**Fig. S5.** The dependence of  $\tau_0/\tau$  on the total content of Tm<sup>3+</sup> and Dy<sup>3+</sup> in SLAB.

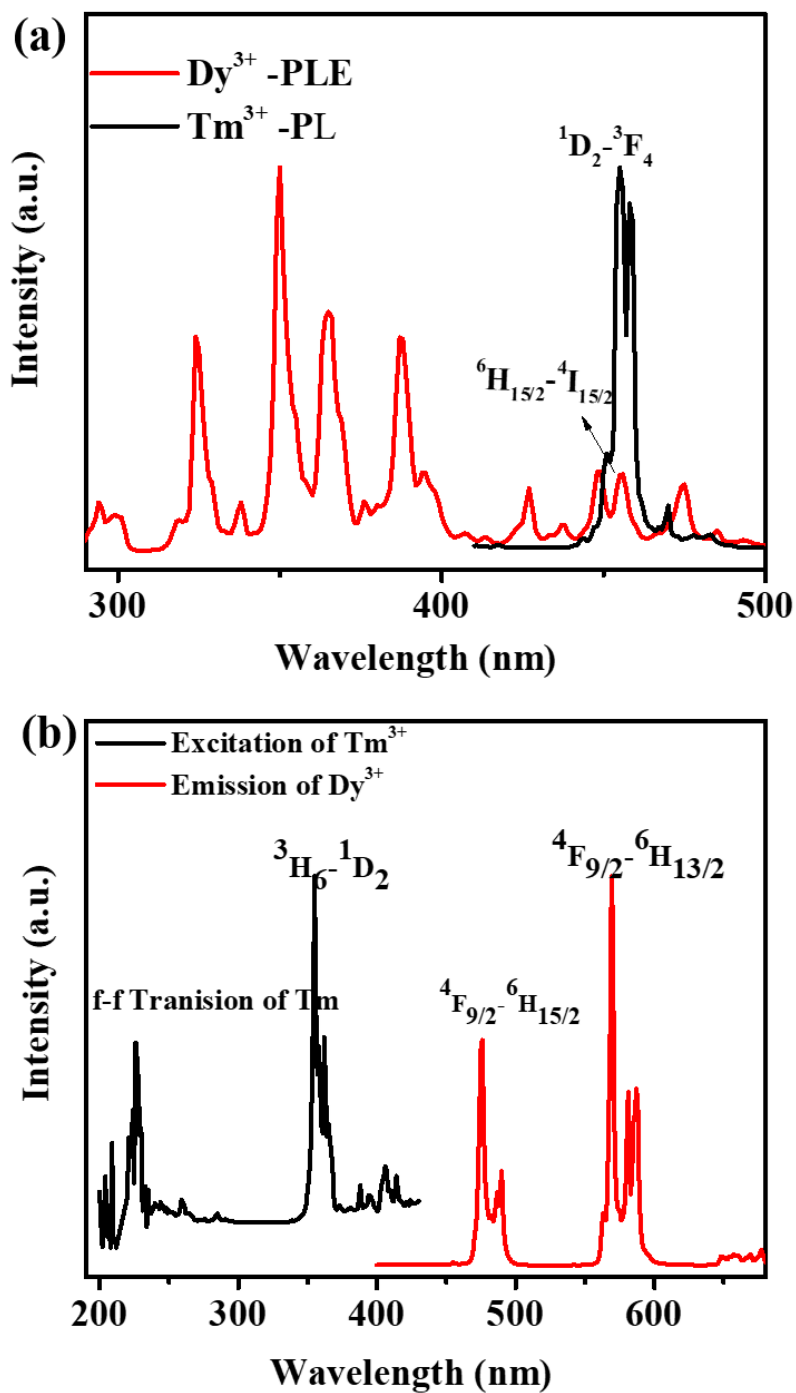

**Fig. S6.** The spectral overlap of Dy<sup>3+</sup> excitation and Tm<sup>3+</sup> emission in SLAB and of Tm<sup>3+</sup> excitation and Dy<sup>3+</sup> emission in SLAB.



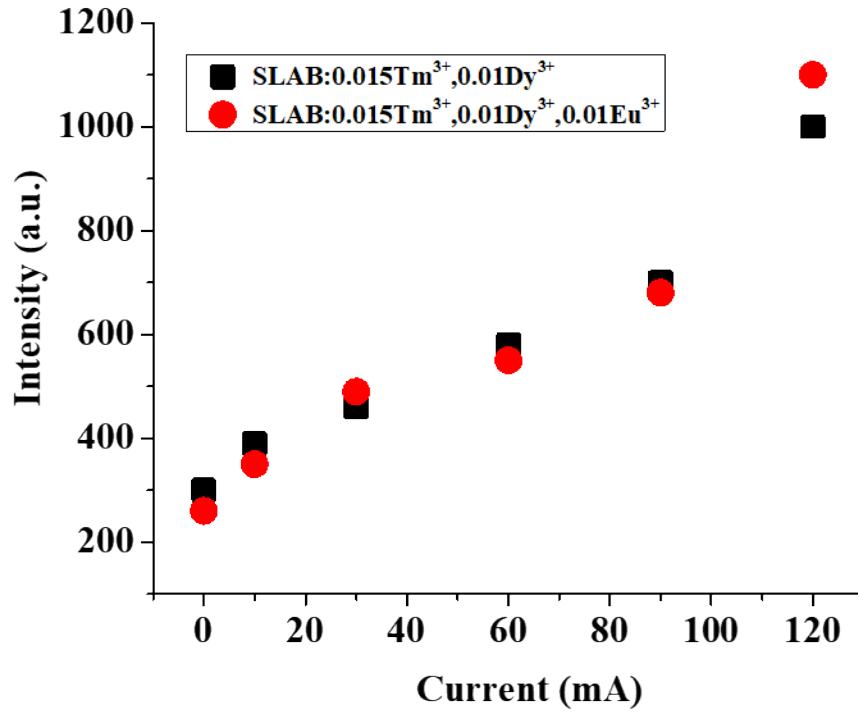

**Fig. S7.** CL intensities under different forwarding bias currents (0–120 mA).

The following formula converts the CIE 1931 x and y values into their corresponding Duv values.<sup>1,</sup>

2

1) Convert chromaticity coordinates from  $(x, y)$  or  $(u', v')$  to  $(u, v)$ , use the following formulas:

$$u = \frac{4x}{(-2x + 12y + 3)} \quad \text{Or} \quad u = u'$$

$$v = \frac{6y}{(-2x + 12y + 3)}$$

$$v = \frac{2v'}{3}$$

2) Duv is obtained by

$$L_{FP} = \sqrt{(u - 0.292)^2 + (v - 0.24)^2}$$

$$a = \arccos\left(\frac{u - 0.292}{L_{FP}}\right)$$

$$L_{BB} = k_6 a^6 + k_5 a^5 + k_4 a^4 + k_3 a^3 + k_2 a^2 + k_1 a + k_0$$

$$D_{uv} = L_{FP} - L_{BB}$$

Where,  $k_0 = -0.471106$ ,  $k_1 = 1.925865$ ,  $k_2 = -2.4243787$ ,  $k_3 = 1.5317403$ ,  $k_4 = -0.5179722$ ,  $k_5 = -0.08939440$ , and  $k_6 = -0.00616793$ . The calculated value of  $D_{uv}$  for SLAB:0.015Tm<sup>3+</sup>,xDy<sup>3+</sup> are listed in **Table S4**.

1. D. Baxter, M. Royer and K. Smet, *Leukos*, 2024, **20**, 55-66.
2. M. Royer, M. J. Murdoch, K. Smet, L. Whitehead, A. David, K. Houser, T. Esposito, J. Livingston and Y. Ohno, *Leukos*, 2023, **19**, 35-52.
